# Supplementary material for: Differential lipid composition and regulation along the hippocampal longitudinal axis
Source: PubMed Central journal article supplement (PMC6486574; doi:10.1038/s41398-019-0478-6), 2019-04-26
Supplement: 41398_2019_478_MOESM1_ESM.pdf [file 41398_2019_478_MOESM1_ESM.pdf]

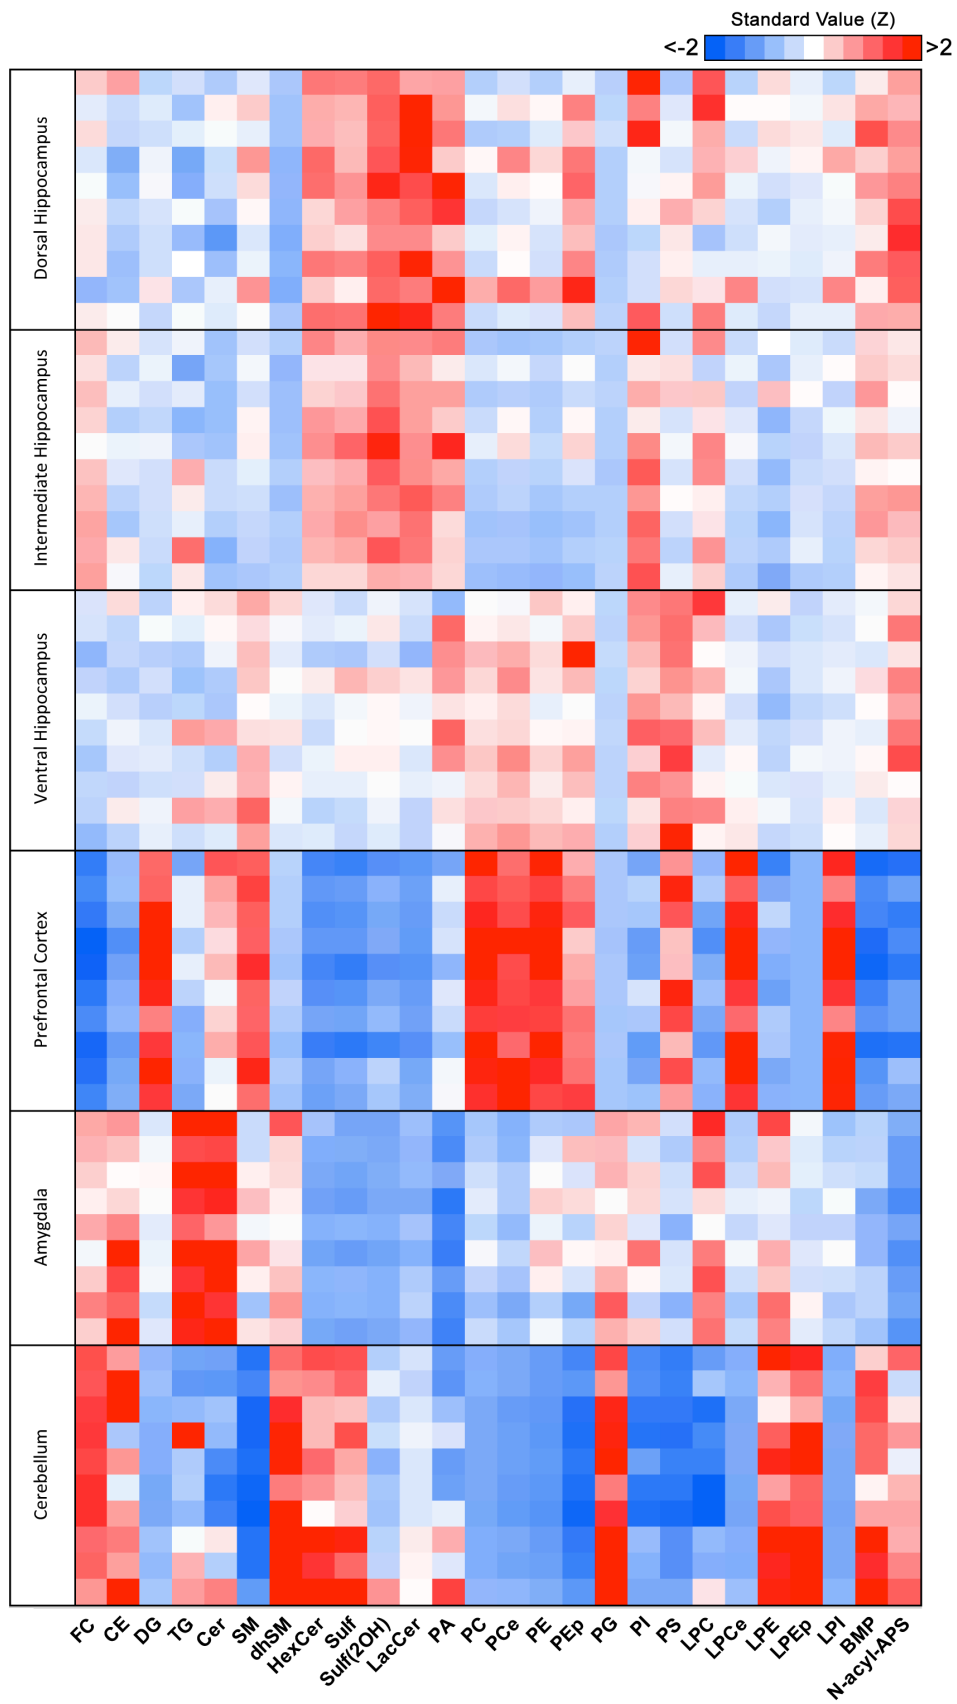

Supplementary Figure 1 – Miranda et al.
